# Supplementary material
Source: PubMed Central journal article supplement (PMC3115331)
Supplement: gmb-34-2-329-suppl1.pdf [file gmb-34-2-329-suppl1.pdf]

**Table S1** - List of specimen, the corresponding number of haplotypes from cytochrome b sequences; Collection Institutional Code of specimens sampled in the present study from Uruguay, and the corresponding GenBank accession numbers. Additional sequences from Spanish, Italian, central European and Japanese wild boars, as well as commercial breeds (Large White, Landrace, Duroc and Pietrain), besides two outgroup taxa, were retrieved from the GenBank.

| Species                               | Cytochrome b sequence | Locality                                          | Collection institutional code | GenBank access number                        |
|---------------------------------------|-----------------------|---------------------------------------------------|-------------------------------|----------------------------------------------|
| <i>Sus scrofa</i> Uruguayan wild boar | hap1                  | Velazquez (Rocha)                                 | S2,S3                         | GU937806                                     |
|                                       | hap2                  | A° Malo (Tacuarembó), R.Negro (Durazno), San José | S14, S18, S21                 | GU937807                                     |
|                                       | hap3                  | Velazquez (Rocha Department)                      | S6                            | GU937808                                     |
|                                       | hap4                  | Velazquez (Rocha Department)                      | S7                            | GU937809                                     |
|                                       | hap5                  | A° Las Cañas (Durazno)                            | S17                           | GU937810                                     |
|                                       | hap6                  | Velazquez (Rocha Department)                      | S9                            | GU937811                                     |
|                                       | hap7                  | Velazquez (Rocha Department)                      | S10                           | GU937812                                     |
|                                       | hap 8                 | A° Arias (Florida)                                | S16                           | GU937813                                     |
|                                       | hap9                  | R. Cebollatí (Lavalleja)                          | S13                           | GU937814                                     |
|                                       | hap10                 | Lazcano (Rocha)                                   | S15                           | GU937815                                     |
|                                       | hap11                 | Velazquez (Rocha Department)                      | S1,S8,S11                     | GU937816                                     |
|                                       | hap12                 | Velazquez (Rocha Department)                      | S5                            | GU937817                                     |
|                                       | hap13                 | Sarandí del Yí (Durazno)                          | S19                           | GU937818                                     |
|                                       | hap14                 | San José                                          | S23                           | GU937819                                     |
| Iberian <i>Sus scrofa</i>             |                       |                                                   | IB17<br>IB19                  | AY237500 AY237502                            |
| <i>Sus scrofa</i> Spanish wild boar   |                       |                                                   | SWB1<br>SWB4<br>SWB6<br>SWB7  | AY237510<br>AY237513<br>AY237515<br>AY237516 |

|                                       |       |  |       |                   |
|---------------------------------------|-------|--|-------|-------------------|
| <i>Sus scrofa</i> Italian wild boar   | EWB3  |  | Ssc3  | AF136549 AJ314558 |
| <i>Sus scrofa</i> Polish wild boar    | EWB2  |  |       | AF136542          |
| <i>Sus scrofa</i> Bulgarian wild boar |       |  | Ssc1  | AJ314556          |
| <i>Sus scrofa</i> Israeli wild boar   | E1    |  | IWB1  | AF163100          |
| <i>Sus scrofa</i> Japanese wild boar  | AWB10 |  |       | AF136550          |
| <i>Sus scrofa</i> Large White         | LW2   |  |       | AF136548          |
| <i>Sus scrofa</i> Landrace            |       |  | LR1   | AY237526          |
| <i>Sus scrofa</i> Duroc               |       |  |       | AF136554          |
| <i>Sus scrofa</i> Pietrain            |       |  | P2    | AY237529          |
| <i>Sus verrucosus</i>                 |       |  | Sve1  | AJ314552          |
| <i>Phacochoerus africanus</i>         |       |  | Pafr1 | AJ314547          |
